# Supplementary material for: Boosting functional properties of active-CMC films reinforced with agricultural residues-derived cellulose nanofibres
Source: Royal Society of Chemistry journal article supplement (doi:10.1039/d3ra04003h), 2023-01-01
Supplement: d3ra04003h1.pdf [file d3ra04003h1.pdf]

## Boosting functional properties of active-CMC films reinforced with agricultural residues-derived cellulose nanofibres

Esther Rincón\*<sup>a</sup>, Jorge De Haro-Niza<sup>a,b</sup>, Ramón Morcillo-Martín<sup>a</sup>, Eduardo Espinosa<sup>a</sup>, and Alejandro Rodríguez\*<sup>a</sup>

<sup>a</sup>BioPrEn Group (RNM940), Chemical Engineering Department, Faculty of Science, Instituto Químico para la Energía y el Medioambiente (IQUEMA), Universidad de Córdoba, 14014, Córdoba (Spain).

<sup>b</sup>Department of Food Science and Technology, Faculty of Veterinary, Universidad de Córdoba, 14014, Córdoba (Spain).

### SUPPLEMENTARY INFORMATION

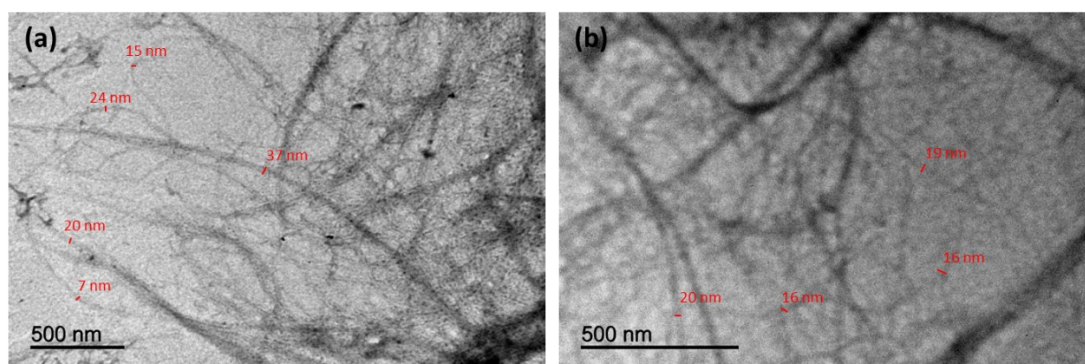

**Figure S1.** TEM images indicating the diameter of some nanofibres for (a) H-MCNF and (b) V-MCNF.

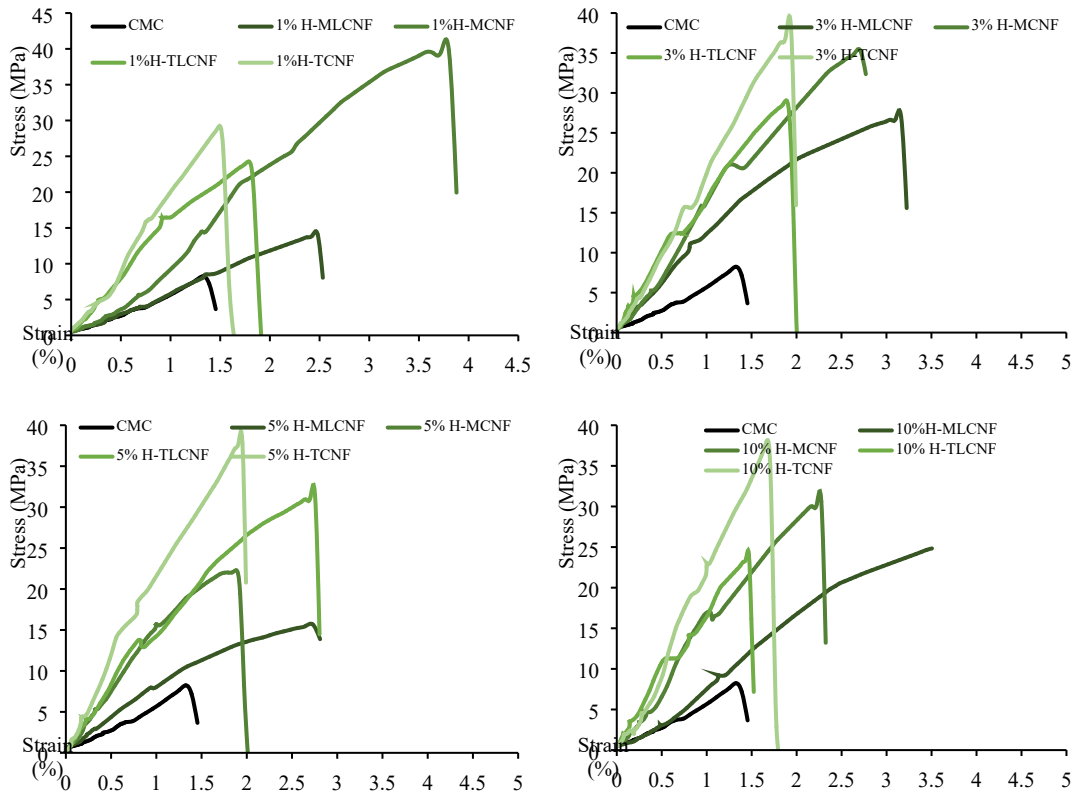

**Figure S2.** Strain-stress curves from CMC/HR-nanofibres based films.

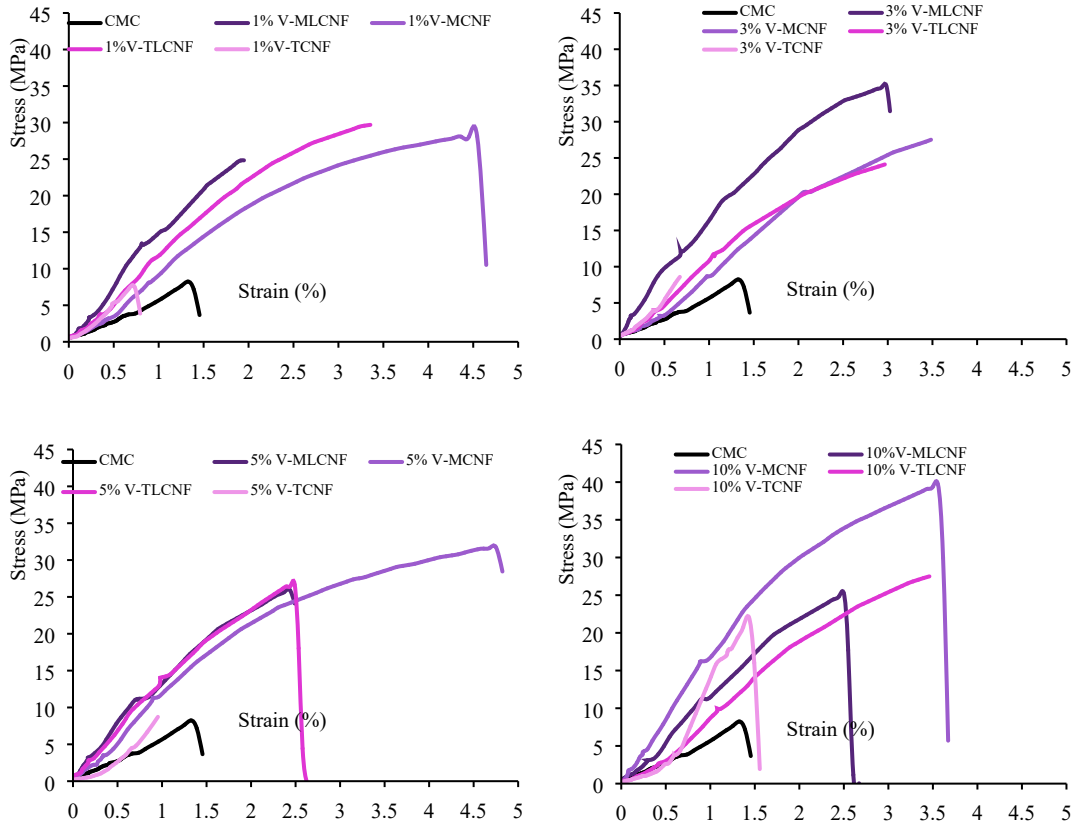

**Figure S3.** Strain-stress curves from CMC/VS-nanofibres based films.

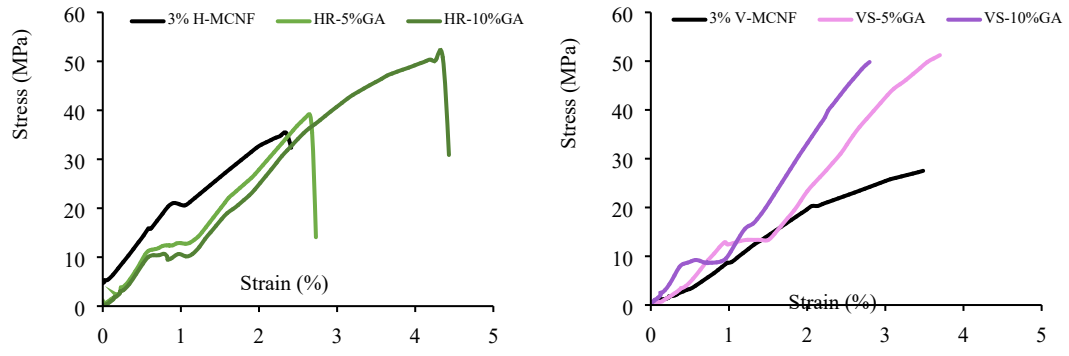

**Figure S4.** Strain-stress curves of the bioactive films.
